# Supplementary material
Source: MDPI journal article supplement (https://www.mdpi.com/2071-1050/16/8/3387)
Supplement: s1 [file s1]

## Supporting Information

# China's Sustainable Energy Transition Path to Low-carbon Renewable Infrastructure Manufacture under Green Trade Barriers

*Jing Tang<sup>1, ω</sup>, Xiao Xiao<sup>1, ω</sup>, Pinhua Rao<sup>1</sup>, Jiaqi Lu<sup>1, \*</sup>*

<sup>1</sup> Innovation Centre for Environment and Resources, School of Chemistry and Chemical Engineering, Shanghai University of Engineering Science, No.333 Longteng Road, Songjiang District, Shanghai 201620, China

<sup>ω</sup> Jing Tang and Xiao Xiao contributed equally to this paper

\*Corresponding author:

Jiaqi Lu

Innovation Centre for Environment and Resources, School of Chemistry and Chemical Engineering, Shanghai University of Engineering Science, No.333 Longteng Road, Songjiang District, Shanghai 201620, China

wilsherlu@foxmail.com, Tel: +86-21-67795965

## **Contents**

S1. Data Source

S2. Scenario Analysis

S3. Electricity decarbonization scenarios

S4. Transport decarbonization scenarios

Reference

## **List of tables**

Table S1. Referred database about the electricity generation by different energy sources

Table S2. Carbon footprint of electricity generation by different energy sources

Table S3. Predicted power generation in various countries or regions

Table S4. Hydro and biomass ratios in different years

Table S5. Carbon footprint of a hybrid grid for every 1kWh of electricity produced

Table S6. The weight per unit of product

Table S7. Qualitative description of different CCS installation ratios

Table S8. Distances at different locations

Table S9. China's average electricity carbon footprint under the three scenarios

Table S10. Calculation data and sources of the 2050 carbon footprint of rail transport in Europe

Table S11. Calculation data and sources of the 2050 carbon footprint of rail transport in China

Table S12. Carbon footprint of electric trucks

## List of figures

Figure S1 Changes in the carbon footprint of national electricity mix under the effect of various shared socio-economic pathway (SSPs)

Figure S2 Changes in the carbon footprint of national electricity mix under the impact of different climate targets under SSP2

Figure S3. Changes in the carbon footprint of national electricity mix under the impact of different proportions of CCS installation (penetration rate in 2050) under the SSP2 scenario of 2°C

## S1. Data Source

The carbon footprint per 1 kWh of electricity produced from the seven sources of coal, natural gas, nuclear power, hydropower, biomass, wind and solar was obtained from the Ecoinvent database (Table S1) and the specific data obtained are shown in Table S2.

Table S1. Referred database about the electricity generation by different energy sources

| Energy sources                 | Database                                                                                                           |
|--------------------------------|--------------------------------------------------------------------------------------------------------------------|
| Coal                           | Ecoinvent: electricity production, hard coal   electricity, high voltage   Cutoff, U                               |
| Natural gas combined cycle     | Ecoinvent: electricity production, natural gas, combined cycle power plant   electricity, high voltage   Cutoff, U |
| Natural gas combustion turbine | Ecoinvent: electricity production, natural gas, conventional power plant   electricity, high voltage   Cutoff, U   |
| Biogas                         | Ecoinvent: heat and power co-generation, biogas, gas engine   electricity, high voltage   Cutoff, U                |
| Hydro                          | Ecoinvent: electricity production, hydro, reservoir, non-alpine region   electricity, high voltage   Cutoff, U     |
|                                | Ecoinvent: electricity production, hydro, run-of-river   electricity, high                                         |

|                      |                                                                                                                                                                                                                         |
|----------------------|-------------------------------------------------------------------------------------------------------------------------------------------------------------------------------------------------------------------------|
|                      | voltage   Cutoff, U                                                                                                                                                                                                     |
| Nuclear power        | Ecoinvent: electricity production, nuclear, boiling water reactor   electricity, high voltage   Cutoff, U<br>Ecoinvent: electricity production, nuclear, pressure water reactor   electricity, high voltage   Cutoff, U |
| Pumped hydro storage | Ecoinvent: electricity production, hydro, pumped storage   electricity, high voltage   Cutoff, U                                                                                                                        |
| Wind                 | Ecoinvent: market for wind turbine, 4.5MW, onshore   wind turbine, 4.5MW, onshore   Cutoff, U                                                                                                                           |
| Photovoltaic         | Ecoinvent: photovoltaic plant construction, 570kWp, multi-Si, on open ground   photovoltaic plant, 570kWp, multi-Si, on open ground   Cutoff, U                                                                         |
| Lithium battery      | Ecoinvent: battery production, Li-ion, rechargeable, prismatic   battery, Li-ion, rechargeable, prismatic   Cutoff, U                                                                                                   |

Table S2 Carbon footprint of electricity generation by different energy sources (kg CO<sub>2</sub>-eq/kWh)

|                | Hydro   | Bio     | Solar PV | Wind    | Nuclear | Natural gas | Coal    |
|----------------|---------|---------|----------|---------|---------|-------------|---------|
| China          | 0.00402 | 0.22896 | 0.07723  | 0.03596 | 0.00758 | 0.68898     | 1.27529 |
| America        | 0.01900 | 0.22896 | 0.04898  | 0.02011 | 0.00657 | 0.54627     | 1.16373 |
| European Union | 0.00594 | 0.22860 | 0.08811  | 0.02695 | 0.00616 | 0.61006     | 1.05712 |
| Japan          | 0.00636 | 0.22896 | 0.08278  | 0.02601 | 0.00672 | 0.60248     | 1.01755 |
| India          | 0.00636 | 0.22896 | 0.07723  | 0.03328 | 0.00642 | 0.57831     | 1.56781 |

Based on the World Energy Outlook report from the International Energy Agency, the electricity produced by different energy sources in China, the United States, the European Union, Japan, and India in 2022, 2030, and 2050 was obtained[1] (Table S3). Renewable energy is assumed to be hydropower and biomass, with the ratio of the two simulated according to IEA's "Net Zero by 2050: A Roadmap for the Global Energy Sector"[2] (Table S4).

Table S3 Predicted power generation in various countries or regions (TWh)

|       | Year | Renewables | Solar PV | Wind    | Nuclear | Nuclear | Coal    |
|-------|------|------------|----------|---------|---------|---------|---------|
| China | 2022 | 2681.36    | 429.15   | 762.39  | 417.71  | 257.20  | 5536.03 |
|       | 2030 | 6073.78    | 2294.43  | 1962.95 | 642.16  | 348.57  | 4662.43 |
|       | 2050 | 12663.80   | 6801.49  | 3875.94 | 1246.67 | 371.06  | 2213.45 |

|       |      |         |         |         |        |         |         |
|-------|------|---------|---------|---------|--------|---------|---------|
| US    | 2022 | 972.90  | 185.27  | 442.39  | 804.25 | 1746.84 | 914.22  |
|       | 2030 | 2205.13 | 828.68  | 1001.43 | 825.20 | 1538.16 | 205.91  |
|       | 2050 | 5509.62 | 3069.24 | 1916.84 | 803.93 | 513.12  | 11.51   |
| EU    | 2022 | 1085.25 | 201.54  | 419.84  | 606.85 | 546.54  | 483.69  |
|       | 2030 | 2176.79 | 625.67  | 984.77  | 623.38 | 333.90  | 87.90   |
|       | 2050 | 3712.56 | 1186.32 | 1789.74 | 575.66 | 104.22  | 3.39    |
| Japan | 2022 | 224.83  | 94.68   | 9.58    | 60.18  | 358.68  | 333.49  |
|       | 2030 | 384.79  | 161.63  | 64.18   | 207.22 | 215.89  | 195.68  |
|       | 2050 | 650.65  | 233.88  | 208.34  | 205.92 | 91.83   | 65.77   |
| India | 2022 | 398.87  | 105.26  | 79.35   | 49.57  | 39.41   | 1270.29 |
|       | 2030 | 980.95  | 480.10  | 189.03  | 127.60 | 83.10   | 1472.44 |
|       | 2050 | 4148.80 | 2499.14 | 1071.14 | 336.58 | 174.83  | 1028.92 |

Table S4 Hydro and biomass ratios in different years

| Year | Hydro | Biomass |
|------|-------|---------|
| 2020 | 0.16  | 0.03    |
| 2030 | 0.15  | 0.05    |
| 2050 | 0.12  | 0.08    |

Based on the above data, the national average electricity carbon footprint of each country or region in 2022, 2030 and 2050 is calculated by weighted average, and the calculation results are shown in Table S5.

Table S5 Carbon footprint of a hybrid grid for every 1kWh of electricity produced (kg CO<sub>2</sub>-eq/kWh)

|       | 2022 | 2030 | 2050 |
|-------|------|------|------|
| China | 0.83 | 0.56 | 0.14 |
| US    | 0.46 | 0.25 | 0.08 |
| EU    | 0.33 | 0.12 | 0.07 |
| Japan | 0.58 | 0.35 | 0.17 |
| India | 1.16 | 0.91 | 0.35 |

The carbon footprint of the transportation phase is the greenhouse gas emissions generated by the sale of products from the place of production to the place of consumption through different modes of transportation. This article mainly considers road, rail and shipping, of which road transportation includes diesel vehicles and electric vehicles. The carbon footprint of electric vehicles is calculated through the Ecoinvent database and literature research<sup>[3, 4]</sup>, and the whole life cycle model of electric vehicles from raw material mining to waste recycling is established. The weight of the product and the carbon footprint factors of different modes of transport are shown in Table S6-7.

Table S6 The weight per unit of product[5-13]

|        | Wind turbine | Photovoltaic panel | Lithium battery |
|--------|--------------|--------------------|-----------------|
| Unit   | t/kWp        | kg/MW              | kg/kWh          |
| Weight | 140          | 52.6               | 9               |

Table S7 Carbon footprints of different modes of transport (kg CO<sub>2</sub>-eq/(t\*km))

|       | Value   | Data sources                                                                                                                 |
|-------|---------|------------------------------------------------------------------------------------------------------------------------------|
| Lorry | 0.08902 | Ecoinvent: transport, freight, lorry >32 metric ton, EURO6   transport, freight, lorry >32 metric ton, EURO6   Cutoff, S     |
|       | 0.17041 | Ecoinvent: transport, freight, lorry 16-32 metric ton, EURO4   transport, freight, lorry 16-32 metric ton, EURO4   Cutoff, U |
| Train | 0.03564 | Ecoinvent: transport, freight train, electricity   transport, freight train   Cutoff, S                                      |
| Sea   | 0.00931 | Ecoinvent: transport, freight, sea, container ship   transport, freight, sea, container ship   Cutoff, S                     |

## S2. Scenario Analysis

Based on SSPs and temperature targets, namely no climate target (NCT)[14], a deep decarbonization target (2°C)[15], and a net-zero emissions target (1.5°C)[16], the Li[17] team projected changes in the energy mix of China's power sector from 2020 to 2050. Based on this data, SSP1+1.5°C, SSP2+2°C, and SSP3+NCT, which represent the low-carbon scenario, the medium-carbon scenario, and high carbon scenario, were selected after calculating and screening the electricity carbon footprint under each pathway. This is shown in Figure S1 and S2.

In Figure S1, mix electricity has the lowest carbon footprint of 0.43 kg CO<sub>2</sub>-eq/kWh (2050) under SSP1. The highest is SSP5, which is consistently maintained at around 1.03 kg CO<sub>2</sub>-eq/kWh. SSP2 serves as an intermediate pathway with a carbon footprint of 0.70 kg CO<sub>2</sub>-eq/kWh in 2050.

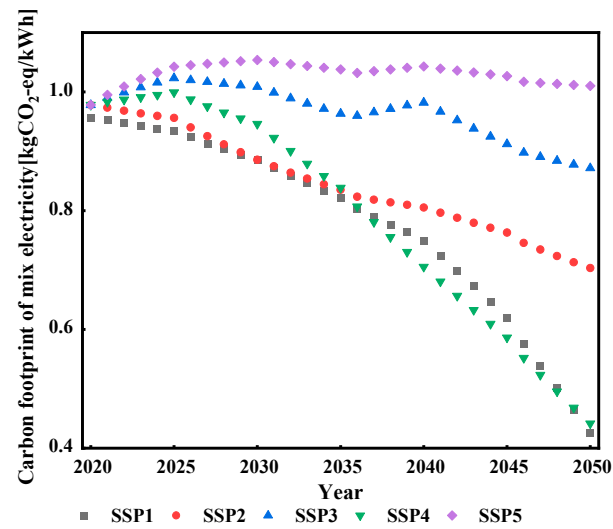

Figure S1 Changes in the carbon footprint of national electricity mix under the effect of various shared socio-economic pathway (SSPs);

The intermediate path SSP2 was chosen to demonstrate the impact of the temperature target on the carbon footprint of mix electricity. Stricter temperature targets will promote grid decarbonization, which is 65.99% and 85.58% lower than NCT, respectively.

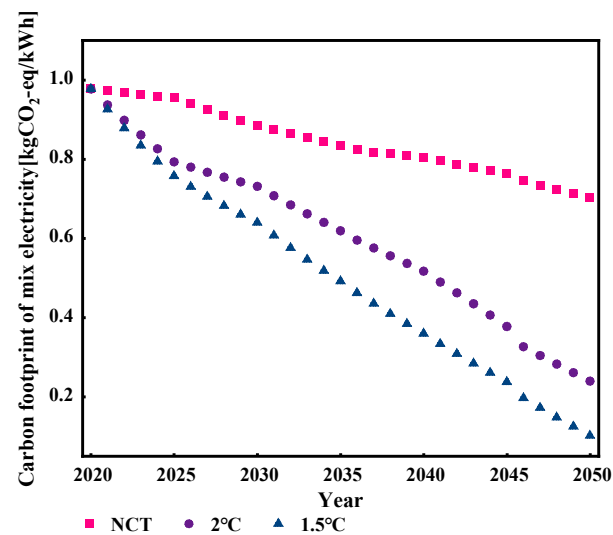

Figure S2 Changes in the carbon footprint of national electricity mix under the impact of different climate targets under SSP2

Then, taking into account the future development of CCS technologies to promote the decarbonization of the power sector, this paper sets different CCS penetration ratios. as shown in Table S7.

Table S7 Qualitative description of different CCS installation ratios

|             | No CCS               | 50%CCS                                               | 100%CCS                                        |
|-------------|----------------------|------------------------------------------------------|------------------------------------------------|
| Description | CCS is not installed | 50% of coal-fired power plants are equipped with CCS | All thermal power plants are equipped with CCS |

Figure S3 shows the effect of different CCS permeability on the change of carbon footprint of the national power structure at SSP2+2°C, and the different permeability rates decreased by 14.87%, 17.47%, 21.17% and 49.65%, respectively compared with No CCS (2050).

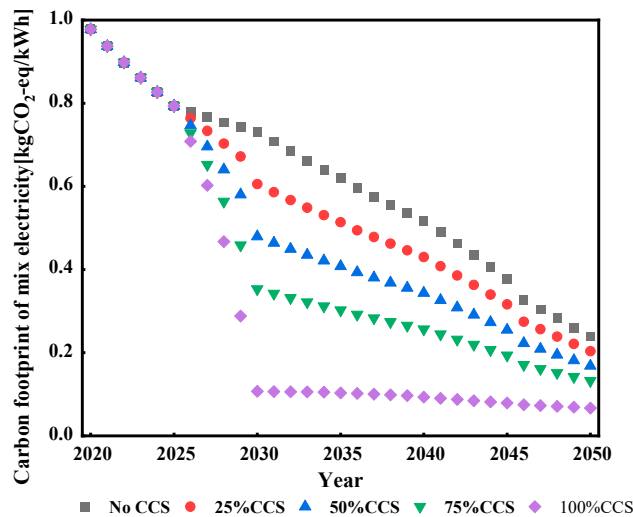

Figure S3. Changes in the carbon footprint of national electricity mix under the impact of different proportions of CCS installation (penetration rate in 2050) under the SSP2 scenario of 2°C.

Based on the above analysis, three special scenarios of SSP1+1.5°C+100%CCS, SSP2+2°C+50%CCS and SSP5+NCT+No CCS were selected to explore the impact of the power sector on low-carbon power infrastructure under extreme and intermediate scenarios.

The distance of transportation is related to the mode and location of transportation. According to the transportation scenario matrix set in the text, the transportation distances of different locations are shown



in Table S8.

Table S8 Distances at different locations (km)

| Transport | Location  |              |                |            |              |
|-----------|-----------|--------------|----------------|------------|--------------|
| Train     | SH-Lhasa  | Urumqi-Lhasa | Urumqi-Hamburg | SH- Urumqi | Urumqi-India |
| Distance  | 4373      | 2814         | 7000           | 4139       | 1793         |
| Highway   | SH-Urumqi | SH-Lhasa     | Urumqi-Lhasa   |            |              |
| Distance  | 3883      | 4126         | 2716           |            |              |
| Shipping  | SH-Tokyo  | SH-India     | SH- Hamburg    | SH-US      |              |
| Distance  | 1941      | 8653         | 19961          | 9997       |              |

Note: SH: Shanghai, China

### S3. Electricity decarbonization scenarios

Based on the 2020-2050 structure of China's power grid projected in the literature<sup>[17]</sup>, the average carbon footprint of China's electricity under three scenarios is calculated.

Table S9 China's average electricity carbon footprint under the three scenarios (kg CO<sub>2</sub>-eq/kWh)

| Year | SSP1+1.5°C+100%CCS | SSP2+2°C+50%CCS | SSP5+NCT+0%CCS |
|------|--------------------|-----------------|----------------|
| 2020 | 0.95672            | 0.95672         | 0.95672        |
| 2021 | 0.91424            | 0.93686         | 0.99488        |
| 2022 | 0.87415            | 0.89778         | 1.00890        |
| 2023 | 0.83736            | 0.86086         | 1.02128        |
| 2024 | 0.80350            | 0.82593         | 1.03228        |
| 2025 | 0.77223            | 0.79283         | 1.04211        |
| 2026 | 0.68958            | 0.74569         | 1.04462        |
| 2027 | 0.58527            | 0.69473         | 1.04703        |
| 2028 | 0.45474            | 0.63944         | 1.04927        |
| 2029 | 0.28697            | 0.57926         | 1.05136        |
| 2030 | 0.19648            | 0.47853         | 1.05331        |
| 2031 | 0.19256            | 0.46328         | 1.04974        |
| 2032 | 0.18922            | 0.44852         | 1.04639        |
| 2033 | 0.18611            | 0.43423         | 1.04324        |

|      |         |         |          |
|------|---------|---------|----------|
| 2034 | 0.18323 | 0.42039 | 1.04028  |
| 2035 | 0.17545 | 0.40697 | 1.03748  |
| 2036 | 0.16472 | 0.39206 | 1.03154  |
| 2037 | 0.15659 | 0.37943 | 1.03459  |
| 2038 | 0.14865 | 0.36696 | 1.03755  |
| 2039 | 0.14087 | 0.35460 | 1.040373 |
| 2040 | 0.13314 | 0.34206 | 1.04252  |
| 2041 | 0.12634 | 0.32479 | 1.03896  |
| 2042 | 0.11967 | 0.30738 | 1.03556  |
| 2043 | 0.11313 | 0.28973 | 1.03231  |
| 2044 | 0.10670 | 0.27179 | 1.02922  |
| 2045 | 0.10180 | 0.25344 | 1.02626  |
| 2046 | 0.09354 | 0.22102 | 1.01658  |
| 2047 | 0.08969 | 0.20716 | 1.01476  |
| 2048 | 0.08586 | 0.19343 | 1.01303  |
| 2049 | 0.08204 | 0.17979 | 1.01139  |
| 2050 | 0.07754 | 0.16627 | 1.00982  |

#### S4. Transport decarbonization scenarios

The carbon footprint of the transportation process after the decarbonization of the grid in 2050 can be calculated from the total carbon footprint of rail transportation, the electricity consumed by rail transportation, the current carbon footprint per unit of electricity, and the carbon footprint per unit of electricity in 2050, as shown in Tables S10 and S11 Estimated value.

The electric train operation is also based upon the corresponding RER dataset in. However, also in this case the Chinese official statistics give a much lower energy use than the European ones, 3.6-time lower electricity consumption per t\*km. Again, the original value has been increased by a factor of 2.67 and the uncertainty factor has been increased compared to the corresponding item in literature<sup>[18]</sup>.

Table S10. Calculation data and sources of the 2050 carbon footprint of rail transport in Europe

| Year        | Category                | Unit | Value   |
|-------------|-------------------------|------|---------|
| Fixed value | Electricity consumption | kWh  | 0.40924 |

|      |                              |                            |         |
|------|------------------------------|----------------------------|---------|
| 2020 | Electricity carbon footprint | kg CO <sub>2</sub> -eq/kWh | 0.04780 |
| 2050 | Electricity carbon footprint | kg CO <sub>2</sub> -eq/kWh | 0.06675 |

Table S11. Calculation data and sources of the 2050 carbon footprint of rail transport in China

| Year        | Category                     | Unit                       | Value   |
|-------------|------------------------------|----------------------------|---------|
| Fixed value | Electricity consumption      | kWh                        | 0.02960 |
| 2020        | Electricity carbon footprint | kg CO <sub>2</sub> -eq/kWh | 1.02534 |
| 2050        | Electricity carbon footprint | kg CO <sub>2</sub> -eq/kWh | 0.07555 |

Table S12 Carbon footprint of electric trucks (kg CO<sub>2</sub>-eq/(t\*km))

| Year | Value   | Year | Value   |
|------|---------|------|---------|
| 2020 | 0.16134 | 2050 | 0.01595 |

## Reference

1. Agency, International Energy. "World Energy Outlook 2023: Executive Summary." 2023.
2. ———. "Net Zero by 2050: A Roadmap for the Global Energy Sector." 2021.
3. Shafique, Muhammad, Anam Azam, Muhammad Rafiq, and Xiaowei Luo. "Life Cycle Assessment of Electric Vehicles and Internal Combustion Engine Vehicles: A Case Study of Hong Kong." *Research in Transportation Economics* 91 (2022): 101112.
4. Li, Wenchao, Hongtao Bai, Jianfeng Yin, and He Xu. "Life Cycle Assessment of End-of-Life Vehicle Recycling Processes in China—Take Corolla Taxis for Example." *Journal of cleaner production* 117 (2016): 176-87.
5. "Jingsun 144 Half-Cell 182mm 570w Mono Solar Panel." <https://www.jingsun-energy.com/Jingsun-144-Half-cell-182mm-570W-Mono-Solar-Panel-pd46370033.html> (
6. "High Efficiency Half Cut Mono Solar Panel 570w." <https://www.sunketsolar.com/standard-mono-solar-panel/59373483.html> (
7. "Jinko Tiger Neo 570w Half-Cut - Jkm570n-72hl4-V." <https://suministrodelsol.com/en/panels-from-505-to-700w/1015-jinko-tiger-neo-570w-half-cut-jkm570n-72hl4-v.html> (
8. "Vestas V150 4.2 Megawatt (Mw) Wind Turbine Generator." <https://www.enelgreenpower.com/content/dam/enel-egp/documenti/impianti/flat-rocks-wind-farme-stage-1-project/resources/Wind%20Turbine%20Factsheet%20for%20Flat%20Rocks%20Wind%20Farm%20Stage%201.pdf> (
9. "3.6mw Series Wind Turbine." <http://shanghaielectric-smec.com/1-3-3-wind-turbines/> (
10. "Hw82 1.5 Mw." [https://www.thewindpower.net/turbine\\_en\\_969\\_hewind\\_hw82-1.5-mw.php](https://www.thewindpower.net/turbine_en_969_hewind_hw82-1.5-mw.php) (
11. "Lithium Ion Batteries: Energy Density?". <https://thundersaidenergy.com/downloads/lithium-ion-batteries-energy-density/> (
12. "Li-on Vs. Lead Acid." [https://www.ultralifecorporation.com/PrivateDocuments/WP\\_li-ion-vs-lead-acid-WEB\\_1.pdf](https://www.ultralifecorporation.com/PrivateDocuments/WP_li-ion-vs-lead-acid-WEB_1.pdf) (
13. EVBox. "Electric Car Battery Weight Explained."
14. van Vuuren, Detlef P., Elmar Kriegler, Brian C. O'Neill, Kristie L. Ebi, Keywan Riahi, Timothy R. Carter, Jae Edmonds, Stephane Hallegatte, Tom Kram, Ritu Mathur, and Harald Winkler. "A New Scenario Framework for Climate Change Research: Scenario Matrix Architecture." *Climatic Change* 122, no. 3 (2013): 373-86.
15. Liu, Qiang, Yi Chen, Fei Teng, Chuan Tian, Xiaoqi Zheng, and Xuchen Zhao. "Pathway and Policy Analysis to China's Deep Decarbonization." *Chinese Journal of Population Resources and Environment* 15, no. 1 (2017): 39-49.
16. Jiang, Kejun, Chenmin He, Hancheng Dai, Jia Liu, and Xiangyang Xu. "Emission Scenario Analysis for China under the Global 1.5 °C Target." *Carbon Management* 9, no. 5 (2018): 481-91.
17. Li, Haoran, Xueqin Cui, Jingxuan Hui, Gang He, Yuwei Weng, Yaoyu Nie, Can Wang, and Wenjia Cai. "Catchment-Level Water Stress Risk of Coal Power Transition in China under 2 °C/1.5 °C Targets." *Applied energy* 294 (2021).
18. Spielmann, Michael, and Roland Scholz. "Life Cycle Inventories of Transport Services: Background Data for Freight Transport (10 Pp)." *The International Journal of Life Cycle Assessment* 10, no. 1 (2005): 85-94.
